# Supplementary material for: Bifidobacterium pseudocatenulatumNCU-08 ameliorated senescenceviamodulation of the AMPK/Sirt1 signaling pathway and gut microbiota in mice
Source: Royal Society of Chemistry journal article supplement (doi:10.1039/d3fo04575g), 2024-01-01
Supplement: d3fo04575g1.pdf [file d3fo04575g1.pdf]

**Supplementary Material Table S1**

| <b>Primers</b>                | <b>Sequences</b>              |
|-------------------------------|-------------------------------|
| $\beta$ -actin-forward primer | 5'-ACATCCGTAAAGACCTCTATGCC-3' |
| $\beta$ -actin-reverse primer | 5'-TACTCCTGCTTGCTGATCCAC-3'   |
| IL-1 $\beta$ -forward primer  | 5'-GTGTCTTTCCCGTGGACCTTC-3'   |
| IL-1 $\beta$ -reverse primer  | 5'-TCATCTCGGAGCCTGTAGTGC-3'   |
| IL-6-forward primer           | 5'- GAAATCGTGAAATGAG-3'       |
| IL-6-reverse primer           | 5'-GCTTAGGCATAACGCACT-3'      |
| TNF- $\alpha$ -forward primer | 5'- GTGGAAGTGGCAGAAGAGGCA-3'  |
| TNF- $\alpha$ -reverse primer | 5'-AGAGGGAGGCCATTTGGGAAC-3'   |

## Supplementary Material Table S2

| Antibodies       | Source/Cat. No. | Cat. No.   |
|------------------|-----------------|------------|
| $\beta$ -actin   | CST             | 4970S      |
| AMPK             | Proteintech     | 66536-1-Ig |
| p-AMPK           | CST             | 50081S     |
| Sirt1            | Abcam           | ab110304   |
| PI3K             | Abcam           | ab151549   |
| p-PI3K           | CST             | 17366S     |
| AKT              | CST             | 9272S      |
| p-AKT            | CST             | 4060S      |
| Bax              | CST             | 2772S      |
| Bcl-2            | CST             | 3498S      |
| TLR4             | Proteintech     | 66350-1-Ig |
| MyD88            | CST             | 4283S      |
| NF- $\kappa$ B   | CST             | 8242S      |
| P-NF- $\kappa$ B | CST             | 3033S      |
| ZO-1             | Proteintech     | 21773-1-AP |
| Occludin         | Proteintech     | 13409-1-AP |

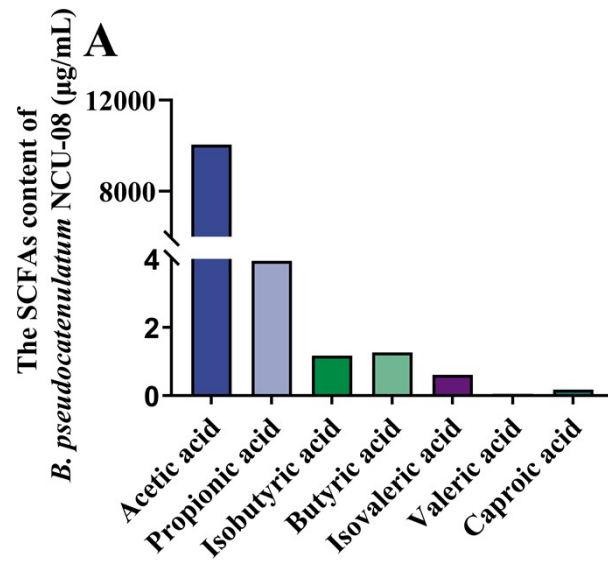

Figure S1. (A) Targeted metabolomics analysis of SCFAs in culture supernatants of *B. pseudocatenulatum* NCU-08 .
